# 1           **Detection of SARS-CoV-2 in saliva using tailed amplicon sequencing**

2           Aaron Garoutte<sup>1</sup>, Tasha M. Santiago-Rodriguez<sup>1</sup>, Heather L. Fehling<sup>2</sup>, Rafal Iwasio<sup>3,\*</sup>

3           <sup>1</sup>Diversigen, Inc., Houston, TX, USA, 77046; <sup>2</sup>Clinical Reference Laboratory, Inc. Lenexa, KS

4                                   66215; <sup>3</sup>DNA Genotek, Inc., Ottawa, Ontario, CA, K2V 1C2

5

## 6           **ABSTRACT**

7           The most recent virus from the *Coronaviridae* family infecting humans, SARS-CoV-2, has  
8           resulted in a global pandemic. As part of the surveillance efforts, SARS-CoV-2 genomes are  
9           increasingly being made publicly available. Methods that include both short- and long-read  
10          sequencing have been used to elucidate SARS-CoV-2 genomes; however, many of these  
11          untargeted approaches may require deeper sequencing for greater genome coverage. For this  
12          reason, sequence capture or amplicon-based approaches for SARS-CoV-2 genome sequencing  
13          have been developed. The present study evaluated a modified sequence capture approach,  
14          namely, tailed amplicon sequencing, to determine SARS-CoV-2 near complete genome  
15          sequences from the saliva of infected individuals. Particularly, the suitability of saliva samples  
16          stored at room temperature using OMNIgene®•ORAL OME-505 was evaluated. The tailed  
17          amplicon sequencing approach poses the additional advantage of being a cost-effective method  
18          for library preparation. Different known SARS-CoV-2 variants were identified across the  
19          infected subjects, with an average of > 99.4% genome coverage. This methodology also enabled  
20          robust genomic surveillance using phylogenetic analyses. The present study supports the  
21          suitability of saliva stored at room temperature using collection devices for SARS-CoV-2 variant  
22          detection. Importantly, the present study supports the use of tailed amplicon sequencing

23 approaches as an alternative, cost-effective method for SARS-CoV-2 detection in saliva for  
24 genomic surveillance.

25

26 **Keywords:** genomic surveillance; SARS-CoV-2; sequence capture; tailed amplicon sequencing

27

28 **\*Corresponding author email:** rafal.iwasiow@dnagenotek.com

29

## 30 INTRODUCTION

31 Human saliva is home to over 700 microbial species, and serves as protection against  
32 bacterial, fungal and viral infections that could potentially reach the respiratory tract (Kilian et  
33 al., 2016). It is composed of water and the secretion of salivary glands, dental plaque, as well as  
34 nasal and bronchial secretions; thus, several different viruses in human saliva can be identified,  
35 some of which may cause disease. The interactions with viruses and specific saliva components  
36 can be virus-specific, complex and can potentially influence their detection as a result of the  
37 biological functions of saliva (Y. Li et al., 2020). Viruses including, but not limited to hepatitis A  
38 (Leon et al., 2015), hepatitis B (Khadse et al., 2016; Parizad et al., 2016), cytomegalovirus (De  
39 Carvalho Cardoso et al., 2015), Epstein Barr virus (Kwok et al., 2015), Zika virus (Bonaldo et  
40 al., 2016), and Severe Acute Respiratory Syndrome-Associated coronavirus (SARS-CoV) (Wang  
41 et al., 2004), have all been detected in the saliva of infected individuals. This has prompted the  
42 investigation of saliva as a potential sample type for the diagnosis of several of the mentioned  
43 viruses, and of potential emerging and re-emerging viral pathogens.

44 The most recent virus from the *Coronaviridae* family known to infect humans, SARS-  
45 CoV-2 has also been identified in the saliva of infected individuals (Y. Li et al., 2020). While the

46 origin of SARS-CoV-2 is a subject of ongoing research and speculation, it shares 96% identity  
47 with a bat coronavirus (Zhou et al., 2020), 90% with coronaviruses present in pangolins (Zhang  
48 et al., 2020), and 80% with SARS-CoV (Zhou et al., 2020). SARS-CoV-2 is known to also be  
49 transmitted through aerosol droplets, which may also include salivary droplets. Several studies  
50 have identified SARS-CoV-2 in saliva (Han and Ivanovski, 2020; Y. Li et al., 2020), and have  
51 proposed its use as an alternative to nasopharyngeal (NP) and oropharyngeal (OP) sample  
52 collection, which pose additional discomfort and the need for trained personnel (Yoon et al.,  
53 2020). In addition, with the availability of at-home collection kits, subjects are more willing to  
54 self-collect saliva (Valentine-Graves et al., 2020). Supervised, self-collected saliva has shown to  
55 perform similarly to clinician-collected NP swabs for the detection of SARS-CoV-2 in terms of  
56 virus detection and quantification (Noah et al., 2020). Success of detection methods for SARS-  
57 CoV-2 depends, among many things, on the persistence and inactivation of the virus and nucleic  
58 acids. For example, SARS-CoV-2 is detectable using reverse transcription PCR (RT-PCR) for an  
59 average of 18 to 20 days, and up 21 to 26 days in some instances (To et al., 2020; Yoon et al.,  
60 2020). Saliva has also been suitable for antibody testing, showing that SARS-CoV-2 antibodies  
61 can be detected as early as 10 days (To et al., 2020). This further supports the use of saliva for  
62 the detection of SARS-CoV-2 nucleic acids and antibodies. Other factors affecting SARS-CoV-2  
63 detection include efficient viral lysis, with various commercially available kits and methods  
64 showing varying levels of efficiency (Chu et al., 2020).

65 The gold standard for the detection of SARS-CoV-2 in any sample type is RT-PCR or  
66 quantitative RT-PCR (RT-qPCR) (Takeuchi et al., 2020). As with any PCR-based method,  
67 success will depend on primer specificity; thus, the RNA target genome(s) sequence(s) should be  
68 known in order to increase sensitivity (D. Li et al., 2020). Other, less evaluated methods for the

69 detection and surveillance of SARS-CoV-2 in various sample types include high-throughput  
70 sequencing. RNA high-throughput sequencing was originally used in combination with other  
71 methods to identify the novel coronavirus in subjects suffering from pneumonia of unknown  
72 origin, showing a similarity close to 90% to coronaviruses present in bats(Wu et al., 2020). High-  
73 throughput sequencing can continue to be used for the surveillance of known and novel SARS-  
74 CoV-2 variants, and also to determine genetic diversity, which is usually not provided by RT-  
75 PCR or RT-qPCR (Pérez Cataluña et al., 2021). Two approaches have been developed for the  
76 detection of SARS-CoV-2 in various sample types using high-throughput sequencing, namely,  
77 untargeted and amplicon-based. Untargeted high-throughput sequencing provides the advantage  
78 of detecting and monitoring both known and emerging SARS-CoV-2 variants, with the caveat of  
79 requiring deeper sequencing to obtain the needed genome coverage for identification, making  
80 this approach relatively more cost-prohibiting. Amplicon high-throughput sequencing, or  
81 sequence capture methods, have been more widely applied for the detection of SARS-CoV-2 as  
82 it represents a more cost-effective approach. One caveat of sequence capture approaches is the  
83 failure to cover the entire viral genome as the primers usually cannot cover the genomic ends  
84 (Gohl et al., 2020).

85 Approaches, such as the ARTIC network, have developed methods for amplicon pool  
86 preparation for the sequencing of SARS-CoV-2 which involve a ‘lab-in-a-suitcase’ that can be  
87 used in remote and resource-limited areas (<https://artic.network/1-about.html>). In the ARTIC  
88 network protocol, the first cDNA strand is enriched by amplifying with two different pools of  
89 primers. This generates amplicons tiling the virus genome, which are then subjected to either  
90 Illumina or Oxford Nanopore library preparation and sequencing. More recently, a modification  
91 to the ARTIC network protocol, known as tailed amplicon sequencing, has been developed to

92 reduce library preparation cost and time (Gohl et al., 2020). The method has been shown to  
93 achieve results comparable to the ARTIC network protocol (Gohl et al., 2020). Briefly, in the  
94 tailed amplicon approach, the first cDNA strand is enriched using the ARTIC v3 primers. In this  
95 case, the primers also contain adapter tails that allow sequencing libraries to be created through a  
96 second indexing PCR. This, in turn, adds sample-specific barcodes and flow cell adapters.  
97 Notably, this modification to the ARTIC protocol has not been extensively tested in saliva  
98 samples. Therefore, the main aim of the present study was to evaluate the suitability of the  
99 modified tailed amplicon sequencing protocol for the detection of SARS-CoV-2 and its ability to  
100 discern potential variants in human saliva.

101

## 102 **MATERIALS AND METHODS**

### 103 **Sample collection and RNA extraction**

104 Saliva samples were collected from various geographical locations in United States using  
105 the OMNIgene®•ORAL OME-505 device (DNA Genotek, Inc) and shipped to Clinical  
106 Reference Laboratory, Inc. for testing using the CRL Rapid Response™ COVID-19 Test. After  
107 testing, the remaining saliva samples collected and stabilized in the OMNIgene®•ORAL OME-  
108 505 devices, were stored at room temperature for up to 15 days prior to RNA extraction (**Table**  
109 **1**). At a later point, one to fifteen days post diagnosis, eight randomly selected samples from a  
110 pool of samples which had previously tested positive for SARS-CoV-2 by the CRL Rapid  
111 Response™ COVID-19 Test were selected to be sequenced. The only criteria used for sample  
112 selection was an initial Ct value <30 (**Table 1**). The randomly selected samples were extracted  
113 using the Zymo Quick RNA/DNA Viral MagBead kit (Cat. No. R2141) following  
114 manufacturer's instructions.

115

## 116 **Sample processing, sequencing and bioinformatic analyses**

117       The extracted RNA was then prepared and sequenced using previously described  
118 methods in Gohl et al., 2020 (Gohl et al., 2020). Briefly, the integrity of the extracted RNA was  
119 analyzed as described previously. After RNA quality and integrity was checked, RT-qPCR was  
120 also performed as described previously. RNA was also processed through the amplicon-based  
121 sequencing method that utilizes adapter tails with the ARTIC network v3 primers, allowing for a  
122 more efficient library preparation (Itokawa et al., 2020). Sequencing was also performed as  
123 previously described using a MiSeq 600-cycle v3 kit following manufacturer's instructions.  
124 After sequencing, the paired ends were joined using PANDAseq (Masella et al., 2012) .  
125 Unaligned reads were aligned to Wuhan-Hu-1 SARS-CoV-2 genome (MN908947.3) using BWA  
126 (Li and Durbin, 2010; Wu et al., 2020). The Ivar software package was used for trimming and  
127 filtering reads (Grubaugh et al., 2019). Ivar was also used to call variants and generate consensus  
128 sequences. The consensus sequences were then strain typed using Pangolin ([github.com/cov-](https://github.com/cov-lineages/pangolin)  
129 [lineages/pangolin](https://github.com/cov-lineages/pangolin)). Genome coverage plots were created using custom R scripts. Phylogenetic  
130 tree was created using the Nextstrain web interface (Hadfield et al., 2018)(v0.14.2, commit:  
131 f62d906, build 655).

132

## 133 **RESULTS AND DISCUSSION**

134       The present study evaluated a modified sequence capture approach, namely tailed  
135 amplicon sequencing, for the detection of SARS-CoV-2 in the saliva of infected individuals [21].  
136 Detection of SARS-CoV-2 in the saliva of infected individuals, both symptomatic and  
137 asymptomatic, has expanded the toolbox of methods for the detection and diagnostics of the

138 virus. While RT-PCR and RT-qPCR are the standard methods for the detection of SARS-CoV-2  
139 in various sample types, tailed amplicon sequencing approaches are also capable of identifying  
140 SARS-CoV-2 in the saliva of infected individuals. Notably, results from the present study  
141 showed that the tailed amplicon sequencing approach was successful in the identification of  
142 various SARS-CoV-2 variants in human saliva (**Table 1**). Results also showed the suitability of  
143 OMNIgene®•ORAL OME-505 for sufficient SARS-CoV-2 RNA recovery for tailed amplicon  
144 sequencing. Moreover, storage of saliva samples at room temperature using OMNIgene®•ORAL  
145 OME-505 for up to 15 days further supports the capacity of this collection device to capture  
146 saliva composition at the time of collection, essential for SARS-CoV-2 diagnostics and  
147 surveillance. While upper and lower respiratory tract specimens were first to be recommended  
148 for SARS-CoV-2 diagnosis, saliva has gained acceptance as a suitable, non-invasive sample  
149 type. Indeed, saliva has been included in numerous FDA Emergency Use Authorizations for the  
150 purpose of SARS-CoV-2 diagnosis, including CRL Rapid Response™. The OMNIgene®•ORAL  
151 OME-505 saliva collection device, which has received EUA for SARS-CoV-2 sample collection,  
152 allows for self-collection and to circumvent the need to store samples on ice or frozen.

153  
154 **Table 1.** Summary of relevant metadata associated with saliva samples including: Pangolin  
155 lineage which indicates the strain identity, Nexclade clade identification which shows the  
156 phylogenetic lineage of the variant, qPCR Ct value for diagnosis, number of raw fastq reads, read  
157 depth on the genome after trimming primers, percent coverage of the genome after trimming and  
158 the number of variants (mutations) identified using iVar.

159  
160

| Saliva | Pangolin | Nextclade | Collection | Diagnosis | Days | Fastqc | Depth | Coverage | ivar num |
|--------|----------|-----------|------------|-----------|------|--------|-------|----------|----------|
|--------|----------|-----------|------------|-----------|------|--------|-------|----------|----------|

| sample ID | Lineage   | Clade       | Location       | Ct value | from sample collection to RNA extraction | Raw Read Pairs | after trimming | (%) After Trimming | variants identified |
|-----------|-----------|-------------|----------------|----------|------------------------------------------|----------------|----------------|--------------------|---------------------|
| A         | B.1.2     | 20G         | Belton, MO     | 27.01    | 15                                       | 192151         | 2316.21        | 99.96              | 18                  |
| B         | B.1       | 20C         | Wilmington, DE | 14.01    | 12                                       | 260188         | 2413.47        | 99.44              | 21                  |
| C         | B.1.2     | 20G         | Bronx, NY      | 16.50    | 3                                        | 233789         | 2547.39        | 99.73              | 29                  |
| D         | B.1.1.222 | 20B         | Blacklick, OH  | 17.40    | 7                                        | 137894         | 1571.84        | 99.96              | 29                  |
| E         | P.2       | 20B         | Orient, OH     | 17.64    | 11                                       | 166102         | 2166.38        | 99.76              | 27                  |
| F         | B.1.427   | 20C         | Manhattan, KS  | 17.90    | 4                                        | 135078         | 1527.50        | 99.91              | 30                  |
| G         | B.1.2     | 20G         | Carson, CA     | 18.28    | 2                                        | 212666         | 2146.30        | 99.81              | 22                  |
| H         | B.1.1.7   | 20I/501Y.V1 | Topeka, KS     | 18.55    | 7                                        | 202621         | 2527.93        | 99.83              | 39                  |

161

162 Interestingly, the tailed amplicon sequencing approach tested in the present study

163 provided near complete genomes (>99.4 % average genome coverage) for all eight samples

164 tested (**Table 1** and **Figure 1**). In addition, the tailed amplicon method produced a relatively

165 uneven genome coverage balance. Indeed, this has been noted previously when comparing the

166 tailed amplicon method with the ARTIC network protocol (Gohl et al., 2020). One feasible

167 explanation for this unevenness in genome coverage is the better balance of the untailed primers

168 utilized in the ARTIC network protocol. Nevertheless, near complete SARS-CoV-2 genomes

169 were obtained in the present study, which may improve insights into virus mutations, evolution,

170 and adaptation (e.g., increased transmissibility and infectivity) compared to evolutionary

171 relationships across spike protein sequences alone. Unlike specific genes, complete or near

172 complete genomic sequences provide the most high-resolution information that allows

173 determination of variant and strain relatedness during outbreaks and pandemics. Thus, the

174 development of cost-effective and less time-consuming protocols to determine genomic

175 sequences is of importance. In addition, near complete genome information may also aid in the

176 classification of SARS-CoV-2 variants into strains. SARS-CoV-2 strain level resolution using

177 tailed amplicon sequencing approaches could potentially aid to bridge mutations within SARS-



178 CoV-2 genomes at a global scale, which in turn may aid to understand virus transmission and  
179 population dynamics. Variant level resolution of SARS-CoV-2 may also facilitate the  
180 identification of novel target regions for vaccine development and therapeutics, particularly  
181 regions across SARS-CoV-2 genomes that may be shared across variants and potential strains.

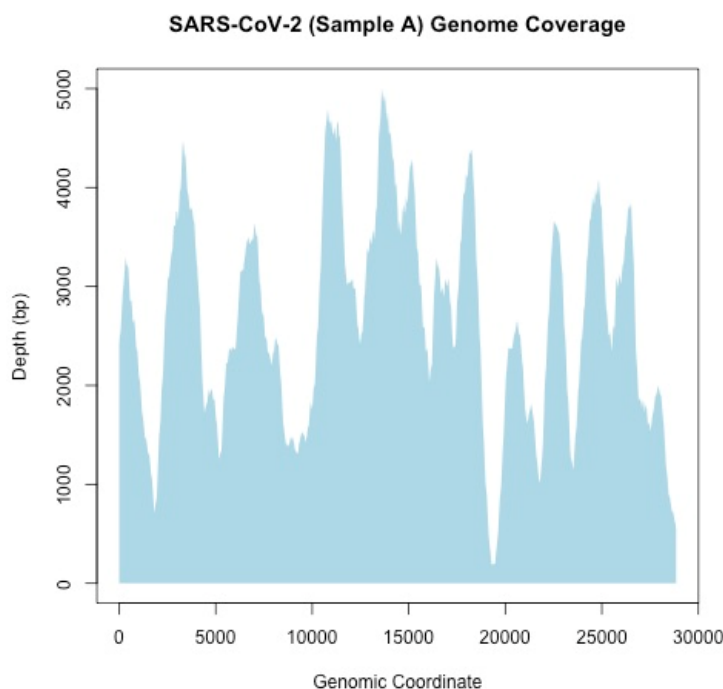

182  
183 **Figure 1.** Representative example of SARS-CoV-2 genome coverage. Graph illustrates that the  
184 combination of sample collection and sequencing methodology is sensitive enough to capture  
185 most of the genome with very high coverage.

186  
187 Near complete genomic sequences obtained using the tailed amplicon sequencing enabled  
188 deciphering phylogenetic relationships across the various SARS-CoV-2 variants identified in the  
189 saliva of the infected individuals in comparison with known clades (**Figure 2**). Results show  
190 that, overall, the tailed amplicon method described above is sensitive enough to resolve, not only  
191 large-scale genomic differences across different clades, but also differences within clades.

192 Phylogenetic relatedness may further contribute to the understanding of the pathogenic dynamics  
193 of SARS-CoV-2 and associated strains over time and link these genetic variations to specific  
194 geographical regions, which in turn can target genomic surveillance efforts.  
195

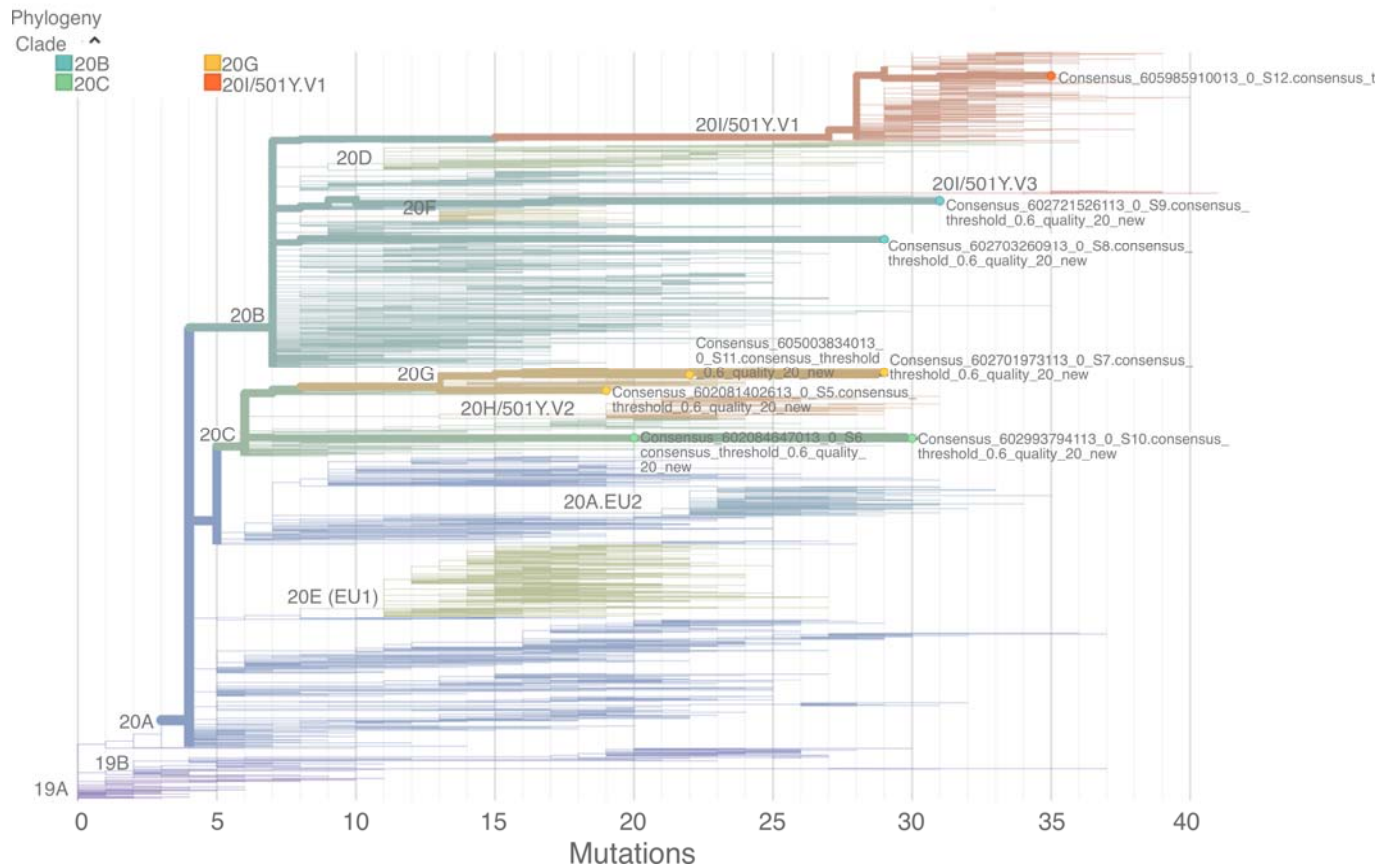

196  
197 **Figure 2.** Phylogenetic analysis of the SARS-CoV-2 variants using Nextstrain clades. Figure  
198 shows that the methodologies described above are sensitive enough to resolve, not only large-  
199 scale genomic differences across different clades, but also differences within clades.

200

201

202

203 **CONCLUSIONS**

204           The present study evaluated tailed amplicon sequencing as a suitable approach for the  
205 detection of SARS-CoV-2 variants in the saliva of infected individuals collected using  
206 OMNIgene®•ORAL OME-505. Near complete genome sequences were obtained using the  
207 evaluated method, which in turn facilitated phylogenetic analysis with various SARS-CoV-2  
208 variants. Near complete or complete genome sequences from SARS-CoV-2 variants continue to  
209 be invaluable in disease control and prevention efforts during the COVID-19 pandemic; thus, the  
210 evaluation of time- and cost-effective methods such as tailed amplicon sequencing is essential.

211

### 212 **Author contributions**

213 AG-data analysis, figure generation and manuscript draft editing. TSR-writing and editing of  
214 original manuscript draft. HLF-sample collection and screening for positive samples RI-  
215 conceptualization, and manuscript draft editing.

216

### 217 **Acknowledgements**

218 We thank Mike Tayeb, Geoffrey M. Graham and Austin Udacor for reviewing the manuscript  
219 draft.

220

### 221 **Funding**

222 No funding was received for this study.

223

### 224 **Informed Consent and Release Statement**

225 Written informed consent and release statement has been obtained from the patient(s) to publish  
226 this paper.

227

228 **Institutional Review Board Statement**

229 The study is exempt under 45 CFR § 46.104(d)(4), because the research involves the use of  
230 identifiable private information/biospecimens; and information, which may include information  
231 about biospecimens, is recorded by the investigator in such a manner that the identity of the  
232 human subjects cannot readily be ascertained directly or through identifiers linked to the  
233 subjects, the investigator does not contact the subjects, and the investigator will not re-identify  
234 subjects.

235

236 **Conflict of interest**

237 AG and TSR are current employees of Diversigen Inc. RI is a current employee of DNA  
238 Genotek.

239

240 **Data availability**

241 SARS-CoV-2 sequence genomes are available on the Global Initiative on Sharing Avian  
242 Influenza Data (GISAID) site under IDs EPI\_ISL\_2156824, EPI\_ISL\_2156826,  
243 EPI\_ISL\_2156827, EPI\_ISL\_2156821, EPI\_ISL\_2156810, EPI\_ISL\_2156811,  
244 EPI\_ISL\_2156823, EPI\_ISL\_2156808.

245

246 **References**

247 Bonaldo MC, Ribeiro IP, Lima NS, dos Santos AAC, Menezes LSR, da Cruz SOD, et al.  
248 Isolation of Infective Zika Virus from Urine and Saliva of Patients in Brazil. PLoS Negl Trop  
249 Dis 2016. <https://doi.org/10.1371/journal.pntd.0004816>.

250 De Carvalho Cardoso ES, De Santos Jesus BL, da Silva Gomes LG, Sousa SMB, Gadelha SR,  
251 Marin LJ. The use of saliva as a practical and feasible alternative to urine in large-scale  
252 screening for congenital cytomegalovirus infection increases inclusion and detection rates. *Rev*  
253 *Soc Bras Med Trop* 2015. <https://doi.org/10.1590/0037-8682-0200-2014>.

254 Chu AWH, Chan WM, Ip JD, Yip CCY, Chan JFW, Yuen KY, et al. Evaluation of simple  
255 nucleic acid extraction methods for the detection of SARS-CoV-2 in nasopharyngeal and saliva  
256 specimens during global shortage of extraction kits. *J Clin Virol* 2020.  
257 <https://doi.org/10.1016/j.jcv.2020.104519>.

258 Gohl DM, Garbe J, Grady P, Daniel J, Watson RHB, Auch B, et al. A rapid, cost-effective tailed  
259 amplicon method for sequencing SARS-CoV-2. *BMC Genomics* 2020.  
260 <https://doi.org/10.1186/s12864-020-07283-6>.

261 Grubaugh ND, Gangavarapu K, Quick J, Matteson NL, De Jesus JG, Main BJ, et al. An  
262 amplicon-based sequencing framework for accurately measuring intrahost virus diversity using  
263 PrimalSeq and iVar. *Genome Biol* 2019. <https://doi.org/10.1186/s13059-018-1618-7>.

264 Hadfield J, Megill C, Bell SM, Huddleston J, Potter B, Callender C, et al. NextStrain: Real-time  
265 tracking of pathogen evolution. *Bioinformatics* 2018.  
266 <https://doi.org/10.1093/bioinformatics/bty407>.

267 Han P, Ivanovski S. Saliva-friend and foe in the COVID-19 outbreak. *Diagnostics* 2020.  
268 <https://doi.org/10.3390/diagnostics10050290>.

269 Itokawa K, Sekizuka T, Hashino M, Tanaka R, Kuroda M. A proposal of alternative primers for  
270 the ARTIC Network's multiplex PCR to improve coverage of SARS-CoV-2 genome sequencing.  
271 *BioRxiv* 2020.

272 Khadse S V., Bajaj G, Vibhakar P, Nainani P, Ahuja R, Deep G. Evaluation of specificity and

273 sensitivity of oral fluid for diagnosis of hepatitis B. *J Clin Diagnostic Res* 2016.  
274 <https://doi.org/10.7860/JCDR/2016/17319.7107>.

275 Kilian M, Chapple ILC, Hannig M, Marsh PD, Meuric V, Pedersen AML, et al. The oral  
276 microbiome - An update for oral healthcare professionals. *Br Dent J* 2016.  
277 <https://doi.org/10.1038/sj.bdj.2016.865>.

278 Kwok H, Chan KW, Chan KH, Chiang AKS. Distribution, persistence and interchange of  
279 epstein-barr virus strains among PBMC, plasma and saliva of primary infection subjects. *PLoS*  
280 *One* 2015. <https://doi.org/10.1371/journal.pone.0120710>.

281 Leon LAA, De Almeida AJ, De Paula VS, Tourinho RS, Villela DAM, Gaspar AMC, et al.  
282 Longitudinal Study of Hepatitis A Infection by Saliva Sampling: The Kinetics of HAV Markers  
283 in Saliva Revealed the Application of Saliva Tests for Hepatitis A Study. *PLoS One* 2015.  
284 <https://doi.org/10.1371/journal.pone.0145454>.

285 Li D, Zhang J, Li J. Primer design for quantitative real-time PCR for the emerging Coronavirus  
286 SARS-CoV-2. *Theranostics* 2020. <https://doi.org/10.7150/thno.47649>.

287 Li H, Durbin R. Fast and accurate long-read alignment with Burrows-Wheeler transform.  
288 *Bioinformatics* 2010. <https://doi.org/10.1093/bioinformatics/btp698>.

289 Li Y, Ren B, Peng X, Hu T, Li J, Gong T, et al. Saliva is a non-negligible factor in the spread of  
290 COVID-19. *Mol Oral Microbiol* 2020. <https://doi.org/10.1111/omi.12289>.

291 Masella AP, Bartram AK, Truszkowski JM, Brown DG, Neufeld JD. PANDAseq: Paired-end  
292 assembler for illumina sequences. *BMC Bioinformatics* 2012. [https://doi.org/10.1186/1471-](https://doi.org/10.1186/1471-2105-13-31)  
293 [2105-13-31](https://doi.org/10.1186/1471-2105-13-31).

294 Noah K, Fred T, Vlad S, Agatha B, Laura D, Siri K, et al. Self-collected oral fluid and nasal  
295 swabs demonstrate comparable sensitivity to clinician collected nasopharyngeal swabs for

296 Covid-19 detection. MedRxiv 2020. <https://doi.org/10.1101/2020.04.11.20062372>.

297 Parizad Elaheh Gholami, Parizad Eskandar Gholami, Khosravi A, Amraei M, Valizadeh A,  
298 Davoudian A. Comparing HBV viral load in serum, Cerumen, and saliva and correlation with  
299 HBeAg serum status in patients with chronic hepatitis B infection. Hepat Mon 2016.  
300 <https://doi.org/10.5812/hepatmon.30385>.

301 Pérez Cataluña A, Chiner-Oms Á, Cuevas Ferrando E, Díaz-Reolid A, Falcó I, Randazzo W, et  
302 al. Detection Of Genomic Variants Of SARS-CoV-2 Circulating In Wastewater By High-  
303 Throughput Sequencing 2021.

304 Takeuchi Y, Furuchi M, Kamimoto A, Honda K, Matsumura H, Kobayashi R. Saliva-based pcr  
305 tests for sars-cov-2 detection. J Oral Sci 2020. <https://doi.org/10.2334/josnugd.20-0267>.

306 To KKW, Tsang OTY, Leung WS, Tam AR, Wu TC, Lung DC, et al. Temporal profiles of viral  
307 load in posterior oropharyngeal saliva samples and serum antibody responses during infection by  
308 SARS-CoV-2: an observational cohort study. Lancet Infect Dis 2020.  
309 [https://doi.org/10.1016/S1473-3099\(20\)30196-1](https://doi.org/10.1016/S1473-3099(20)30196-1).

310 Valentine-Graves M, Hall E, Guest JL, Adam E, Valencia R, Shinn K, et al. At-home self-  
311 collection of saliva, oropharyngeal swabs and dried blood spots for sars-cov-2 diagnosis and  
312 serology: Postcollection acceptability of specimen collection process and patient confidence in  
313 specimens. PLoS One 2020. <https://doi.org/10.1371/journal.pone.0236775>.

314 Wang WK, Chen SY, Liu IJ, Chen YC, Chen HL, Yang CF, et al. Detection of SARS-associated  
315 coronavirus in throat wash and saliva in early diagnosis. Emerg Infect Dis 2004.  
316 <https://doi.org/10.3201/eid1007.031113>.

317 Wu F, Zhao S, Yu B, Chen YM, Wang W, Song ZG, et al. A new coronavirus associated with  
318 human respiratory disease in China. Nature 2020. <https://doi.org/10.1038/s41586-020-2008-3>.

319 Yoon JG, Yoon J, Song JY, Yoon SY, Lim CS, Seong H, et al. Clinical significance of a high  
320 SARS-CoV-2 viral load in the Saliva. *J Korean Med Sci* 2020.  
321 <https://doi.org/10.3346/JKMS.2020.35.E195>.  
322 Zhang T, Wu Q, Zhang Z. Probable Pangolin Origin of SARS-CoV-2 Associated with the  
323 COVID-19 Outbreak. *Curr Biol* 2020. <https://doi.org/10.1016/j.cub.2020.03.022>.  
324 Zhou P, Yang X Lou, Wang XG, Hu B, Zhang L, Zhang W, et al. A pneumonia outbreak  
325 associated with a new coronavirus of probable bat origin. *Nature* 2020.  
326 <https://doi.org/10.1038/s41586-020-2012-7>.  
327
